# Supplementary material
Source: ML conference proceedings conference paper supplement (https://openaccess.thecvf.com/content/CVPR2026/html/Pan_SparseCam4D_Spatio-Temporally_Consistent_CVPR_2026_paper.html)
Supplement: Supplementary file 1 [file Pan_SparseCam4D_Spatio-Temporally_Consistent_CVPR_2026_supplemental.pdf]

# SparseCam4D: Spatio-Temporally Consistent 4D Reconstruction from Sparse Cameras

## Supplementary Material

### 1. Implementation Details

Our framework is implemented in PyTorch, using the RealTime4DGS codebase as the foundation. To assess the versatility of our method, we did not apply dataset-specific tuning; instead, a unified training schedule was adopted across all datasets. For the optimization of 4D Gaussians, we strictly follow the official RealTime4DGS implementation. The Adam optimizer is employed throughout. The learning rate for each feature plane starts at  $1.6 \times 10^{-3}$  and exponentially decays to  $1.6 \times 10^{-4}$ . The tiny MLP decoder is trained with an initial learning rate of  $1.6 \times 10^{-4}$ , which decays to  $1.6 \times 10^{-5}$ . In the distortion field, we configure the base resolution of the spatial axes to 64. The basis resolution for temporal axis is set according to the total number of frames in the training sequence, while the pose axis is set to the number of generated views. For the multi-resolution feature structure, we employ a scale factor of 2 for each feature plane. We also find that expanding this factor from 2 to [2,4] will contribute to rendering quality at the expense of higher training cost. To stabilize the optimization process, we introduce a warm-up stage during the first 1000 iterations. In this phase, only the 4D Gaussian primitives are optimized, while both the distortion field and camera pose optimization remain frozen. After this warm-up stage, joint optimization over the distortion field, camera poses, and Gaussian attributes is enabled. This staged training scheme prevents instability in the early iterations and ensures smoother convergence.

#### 1.1. Camera Selection

##### 1.1.1. Training Cameras

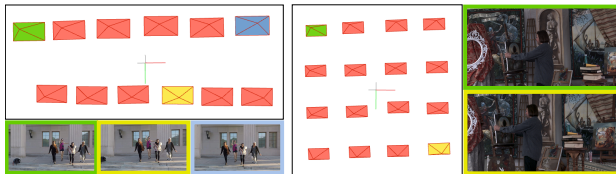

(a) Jumping

(b) Painter

Figure 1. **Visualization of selected training cameras.** The non-red frustums denote the cameras used for training, corresponding to the images shown at the bottom and on the right respectively. The remaining red frustums indicate the cameras used for evaluation.

We construct a minimal subset of cameras  $C_s$  from the original set  $C$  (usually containing 12-21 cameras) to serve as the training views. The subset  $C_s$  is required to satisfy

---

**Algorithm 1:** Camera Subset Selection with Overlap-Constrained Greedy Expansion

---

**Input:**

$P[i]$ : Visible point sets for each camera  $i$   
 $\text{overlap}[i][j]$ : overlap matrix between camera  $i$  and camera  $j$ , defined as  $\text{overlap}[i][j] = \frac{|P_i \cap P_j|}{|P_i \cup P_j|}$

$o_{\min}$ : overlap threshold

$\tau$ : target coverage

$\mu$ : overlap weight

**Output:** Selected camera subset for training  $C_s$

```

1 foreach camera  $i$  do
2    $G_{\text{nbr}}[i] \leftarrow \{j \mid \text{overlap}[i][j] \geq o_{\min}, j \neq i\}$ 
3 end
4  $P_{\text{total}} \leftarrow \bigcup_i P[i]$  // all visible points
5  $U \leftarrow P_{\text{total}}$  // uncovered points
6  $c_0 \leftarrow$  top-left camera
7  $C_s \leftarrow \{c_0\}$ 
8  $U \leftarrow U \setminus P[c_0]$ 
9  $c_{\text{cur}} \leftarrow c_0$ 
10 while  $1 - |U|/|P_{\text{total}}| < \tau$  do
11    $\mathcal{N} \leftarrow \{v \in G_{\text{nbr}}[c_{\text{cur}}] \mid v \notin C_s\}$ 
12   if  $\mathcal{N} = \emptyset$  then
13     break
14   end
15   foreach  $v \in \mathcal{N}$  do
16      $\text{gain}(v) \leftarrow |P[v] \cap U|$ 
17      $\text{score}(v) \leftarrow \text{gain}(v) \cdot (1 + \mu \cdot \text{overlap}[c_{\text{cur}}][v])$ 
18   end
19    $v^* \leftarrow \arg \max_{v \in \mathcal{N}} \text{score}(v)$ 
20   if  $|P[v^*] \cap U| = 0$  then
21     break
22   end
23    $C_s \leftarrow C_s \cup \{v^*\}$ 
24    $U \leftarrow U \setminus P[v^*]$ 
25    $c_{\text{cur}} \leftarrow v^*$ 
26 end
27 return  $C_s$ 

```

---

two conditions: 1)  $C_s$  should sufficiently cover the scene content observed by  $C$ ; 2) Since VDM will interpolate additional viewpoints within  $C_s$ , the per-frame overlap among cameras in  $C_s$  is expected to be similar in order to ensure uniform scene coverage. Based on these criteria, we propose a greedy selection strategy that jointly considers visible point coverage and field-of-view overlap. The algorithm begins by choosing the camera located at the top-left

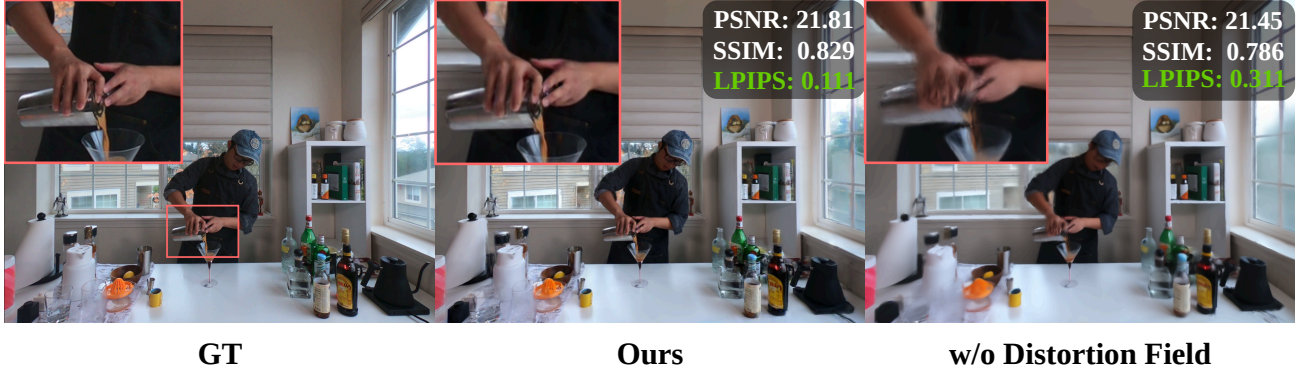

Figure 2. **Reliability of PSNR vs. LPIPS in Ablation Experiments.** We find that directly using generated-view reconstruction introduces severe oversmoothness that, paradoxically, favors PSNR computation, preventing PSNR from accurately reflecting changes in reconstruction quality. In contrast, LPIPS effectively captures the variations in reconstruction quality under these ablation settings.

position as the starting view. At each iteration, we construct a set of candidate cameras whose overlap with the current camera exceeds the minimum adjacency threshold  $o_{min}$ . For each candidate  $v$ , we compute a score that balances newly covered points and the geometric consistency with the current camera:

$$\text{score}(v) = |P[v] \cap U| \cdot (1 + \mu \cdot \text{overlap}[c_{cur}, v]), \quad (1)$$

where  $U$  denotes the set of currently uncovered points and  $\mu = 0.05$  is the overlap weight. The first term encourages maximal expansion of scene coverage, while the second ensures that consecutive selected cameras maintain sufficient overlap for reliable view interpolation using generative models. The candidate with the highest score is added to the selected subset, and the uncovered set is updated accordingly. The process iterates until the target coverage ratio is achieved or no valid candidates remain, yielding the final camera subset. We summarize the details in Algorithm 1. Tab. 6-8 provides camera index references for training and evaluation. Fig. 1 illustrates the selected training cameras from two example scenes *Jumping* and *Painter*, with the training cameras highlighted in different colors.

### 1.1.2. Evaluation Cameras

To fully reflect the rendering quality of each method under the sparse-view setting, we do not adopt the original approach of evaluation using only one single selected camera. Instead, evaluation is performed on all remaining cameras.

## 2. Metrics selection in Ablation Study

In the ablation study, SSIM and LPIPS are adopted as the primary evaluation metrics instead of PSNR. This choice is motivated by two considerations. First, SSIM and LPIPS are more sensitive to structural details, with LPIPS in particular capturing perceptual differences in texture, sharpness, and local geometry, whereas PSNR primarily reflects pixel-wise color discrepancies and is less aligned with perceptual

image quality. Second, as illustrated in Fig. 2, the rendered images produced without distortion field exhibit substantial generative inconsistency, leading to overly smooth and blurred outputs. Such behavior tends to favor PSNR, resulting in only a marginal difference. In contrast, SSIM and LPIPS, especially LPIPS, capture the degradation of structural fidelity and perceptual quality, revealing the significant discrepancy.

## 3. Additional Evaluation Results

### 3.1. Evaluation under Different Sparsity Levels.

We compare our method with the baseline 4DGS approach, *i.e.* 4DGaussian, under different sparsity levels, and the results are reported in Tab. 1. Our method outperforms the baseline across all camera-view configurations, further demonstrating its practical robustness.

Table 1. **Performance with different number of camera views.** We set 4DGaussian as the baseline model for dynamic scene reconstruction and evaluate the rendering quality with different number of training views.

|            | 3 views         |                 |                    | 6 views         |                 |                    | 9 views         |                 |                    |
|------------|-----------------|-----------------|--------------------|-----------------|-----------------|--------------------|-----------------|-----------------|--------------------|
|            | PSNR $\uparrow$ | SSIM $\uparrow$ | LPIPS $\downarrow$ | PSNR $\uparrow$ | SSIM $\uparrow$ | LPIPS $\downarrow$ | PSNR $\uparrow$ | SSIM $\uparrow$ | LPIPS $\downarrow$ |
| 4DGaussian | 16.72           | 0.435           | 0.546              | 19.86           | 0.581           | 0.448              | 21.41           | 0.601           | 0.430              |
| Ours       | 21.56           | 0.656           | 0.264              | 23.58           | 0.687           | 0.243              | 24.72           | 0.751           | 0.205              |

### 3.2. Efficiency Comparison with RealTime4DGS

Since our implementation is based on the RealTime4DGS codebase, we compare our method against it in terms of rendering fps to further evaluate efficiency. As shown in Tab 2, our approach maintains the similar rendering speed as RealTime4DGS. Notably, the proposed distortion field is discarded after training, so inference complexity remains comparable to RealTime4DGS.

### 3.3. Per-scene Breakdown Results

In Tab. 4, Tab. 3, and Tab. 5, we provide a breakdown of the metrics for different scenes in the Neural 3D Video, Tech-

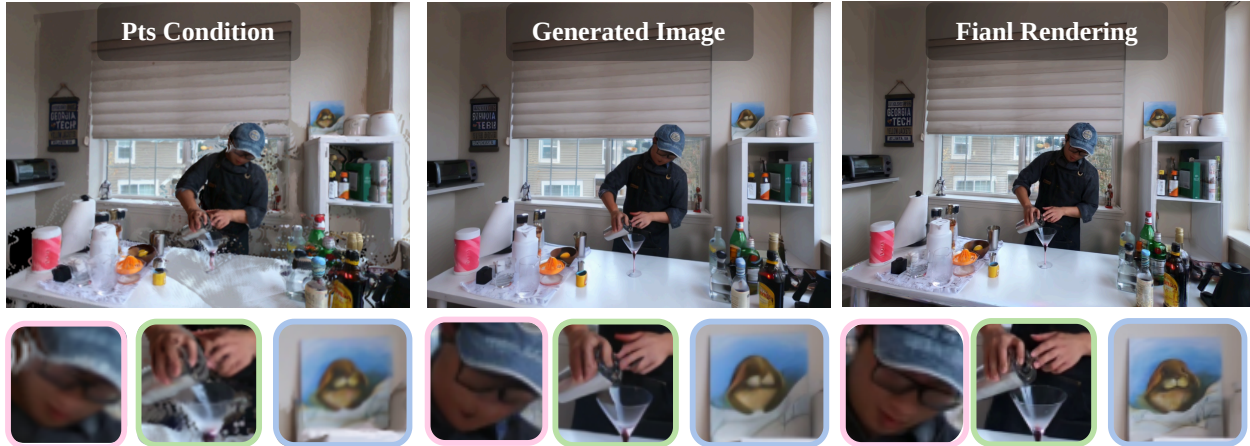

Figure 3. Visualization of the point-cloud rendering condition, generation prior, and final results.

Table 2. Efficiency Comparison with RealTime4DGS.

|              | Coffee Martini | Playground | Average  |
|--------------|----------------|------------|----------|
| RealTime4DGS | 11.48fps       | 11.51fps   | 11.50fps |
| Ours         | 11.82fps       | 11.97fps   | 11.90fps |

nicolor, and Nvidia Dynamic Scenes datasets, respectively. As shown in the quantitative results, our method demonstrates clear superiority over the other five approaches. This indicates that our method effectively leverages the generated priors while mitigating the inconsistency they may introduce. In addition, since our evaluation is conducted on all cameras excluding those used for training, we provide more detailed per-camera metrics, as reported in Tab. 6-8.

### 3.4. Additional Qualitative Results

In Fig. 6, Fig. 7-10, and Fig. 12, 11, we showcase additional rendering comparisons with those methods aforementioned at different timesteps. Our method consistently recovers high-quality and coherent renderings over time, demonstrating its effectiveness in dynamic scenes with sparse observation. Please zoom in for more details.

## 4. More Details for Generated Images

In our main experiments, we adopt ViewCrafter to provide additional observations, from which 20–25 generated views are uniformly sampled for training. ViewCrafter conditions its diffusion model on point-cloud renderings obtained from Dust3R, given two input images along with the target trajectory. However, we find that the quality of generated images is highly dependent on the quality of the point-cloud renderings. To improve the generation quality, we replace Dust3r with a stronger 3D foundation model, VGGT, to produce more reliable conditioning signals. Despite this improvement, the generated sequences still exhibit spatio-temporal inconsistencies that hinder their direct use for 4D reconstruction, as illustrated in Fig 3. Such inconsistencies can lead to severe over-blurring in the reconstructed results, as

shown in Fig. 2 (right).

As for the ablation study with ReCamMaster, unlike ViewCrafter, which leverages point-cloud renderings as trajectory priors, ReCamMaster directly conditions on camera parameters to generate a video sequence of 81 frames. Without explicit geometric constraints, the generated images from vanilla ReCamMaster suffer from severe hallucinations, making them unsuitable for reconstruction. To address this, we finetune ReCamMaster by incorporating point-cloud renderings as an additional conditioning signal, analogous to ViewCrafter.

### 4.1. Failure Case

Although our method substantially mitigates the inter-frame inconsistencies caused by distortions in generated images, the final performance still partially depends on the quality of the generated images themselves. As illustrated in Fig. 4, when the generated images are of poor quality—typically due to out-of-domain inputs or generative hallucinations—such as the severely deformed human body and the additional ghosting artifacts shown in the figure, addressing only the inter-image inconsistency is insufficient to achieve satisfactory reconstruction results. Without considering training cost, incorporating the generative model into the reconstruction pipeline for joint or iterative optimization is a promising direction for future exploration.

## 5. More visualization

To gain an intuitive understanding of the STDF training results, we visualize the full feature maps (16 channels) of each plane in the CoffeMartini scene in Fig. 5. The activated regions vary across different dimensions, indicating the intertwined nature of spatial and temporal deformations.

To further interpret the outputs, we render the deformation predictions of STDF as an additional attribute field. This allows us to clearly observe the regions in the scene

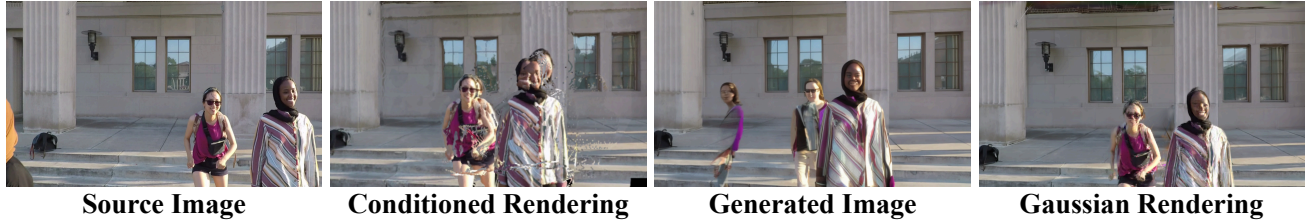

Figure 4. **Visualization of one failure case.** From left to right are the source image and point-cloud-rendering condition provided to ViewCrafter, the corresponding generated image, and a Gaussian rendering near that generated image. Since ViewCrafter is primarily trained on scene-centric data with few human subjects, this example suffers from an out-of-domain issue. In addition, the quality of the point-cloud-rendering condition is relatively low. These factors jointly lead to low-quality generated images, which in turn degrade the Gaussian reconstruction quality on the human body.

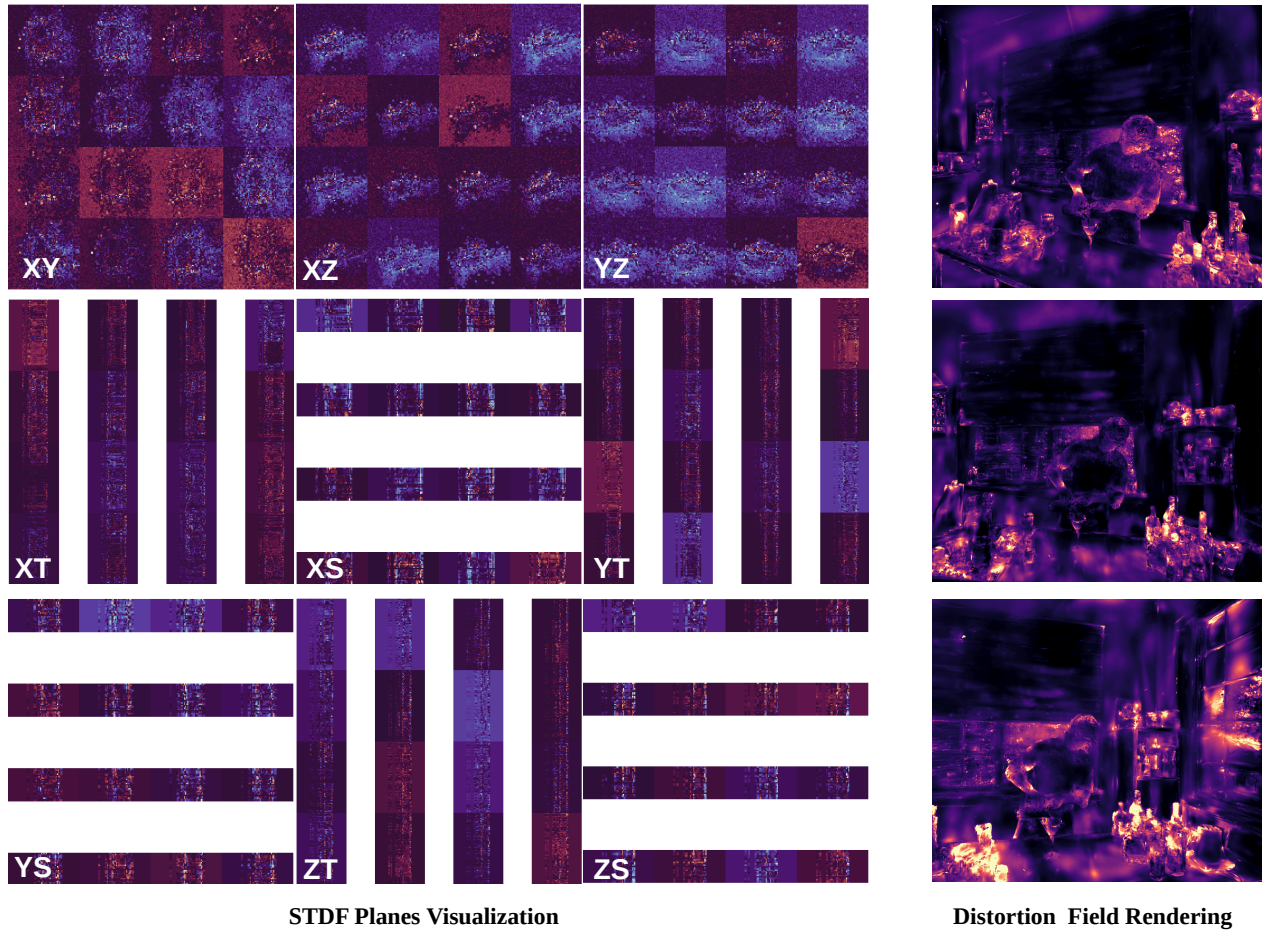

Figure 5. Visualization of Spatio-Temporal Distortion Field

where distortions occur. Through this visualization approach, we can intuitively perceive the spatio-temporal distortions present in the 4D scene.

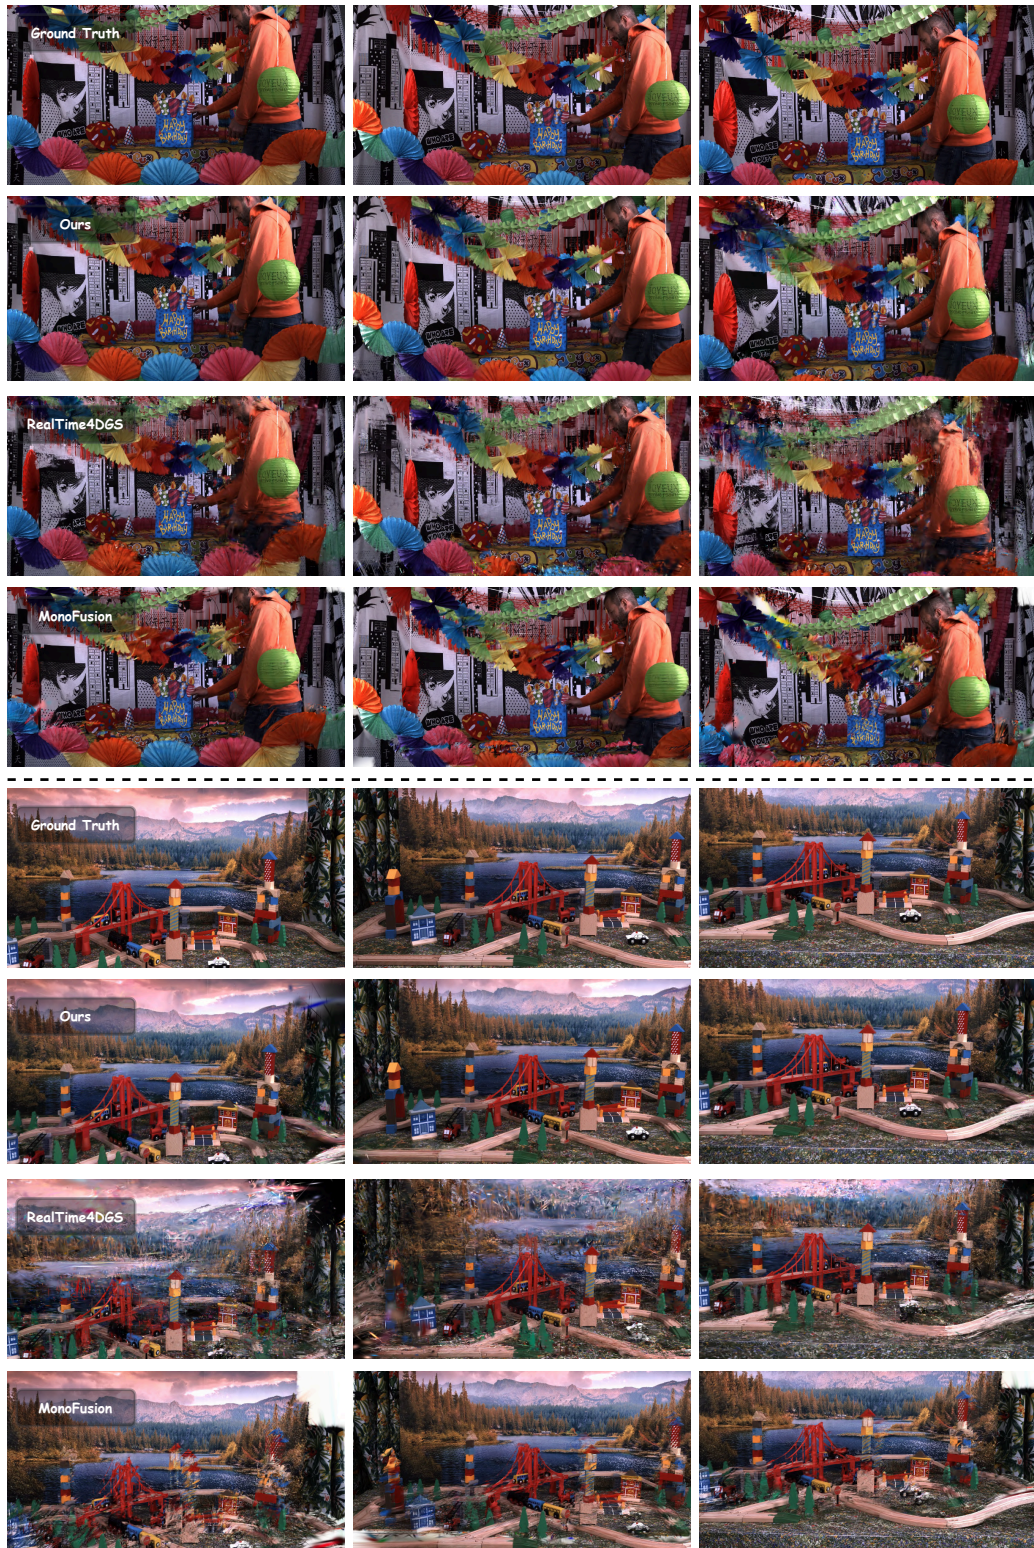

Figure 6. **Additional qualitative comparison results on *Technicolor* Dataset.** We highlight the geometric completeness of background structures, bottom decorations, and the red bridge across different viewpoints, as well as the temporal consistency of dynamic regions such as human faces, the ‘Happy Birthday’ text, and the toy train.

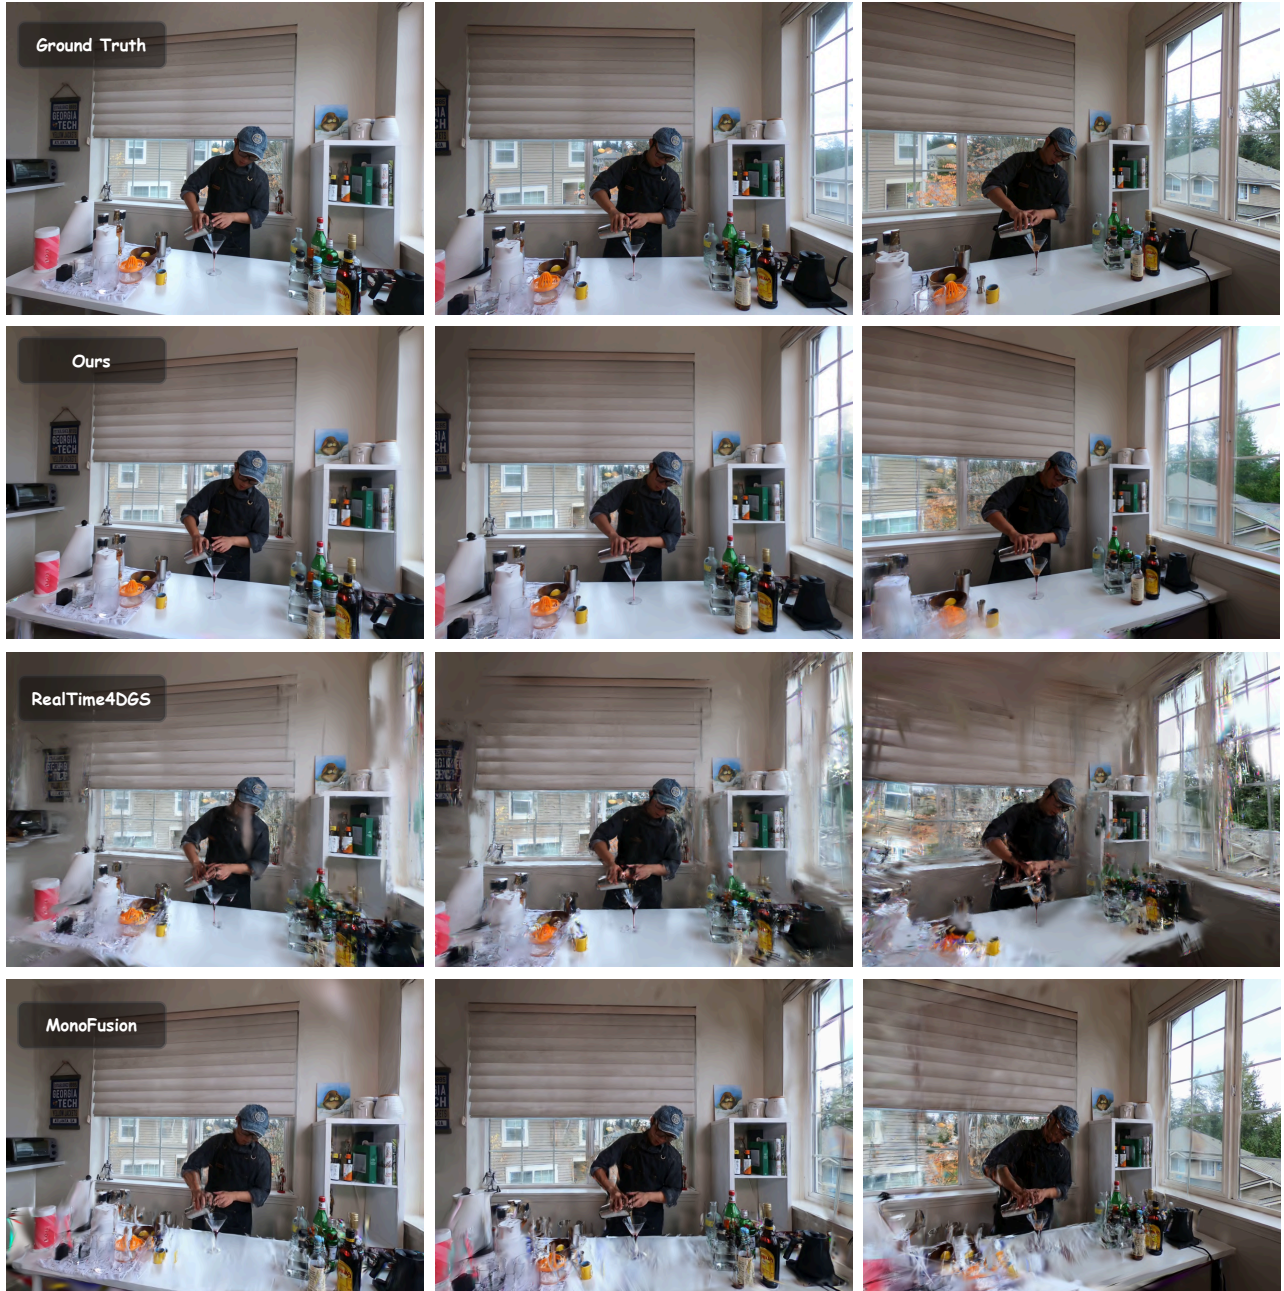

Figure 7. Additional qualitative comparison results on *Neural 3D Video Dataset* (part I).

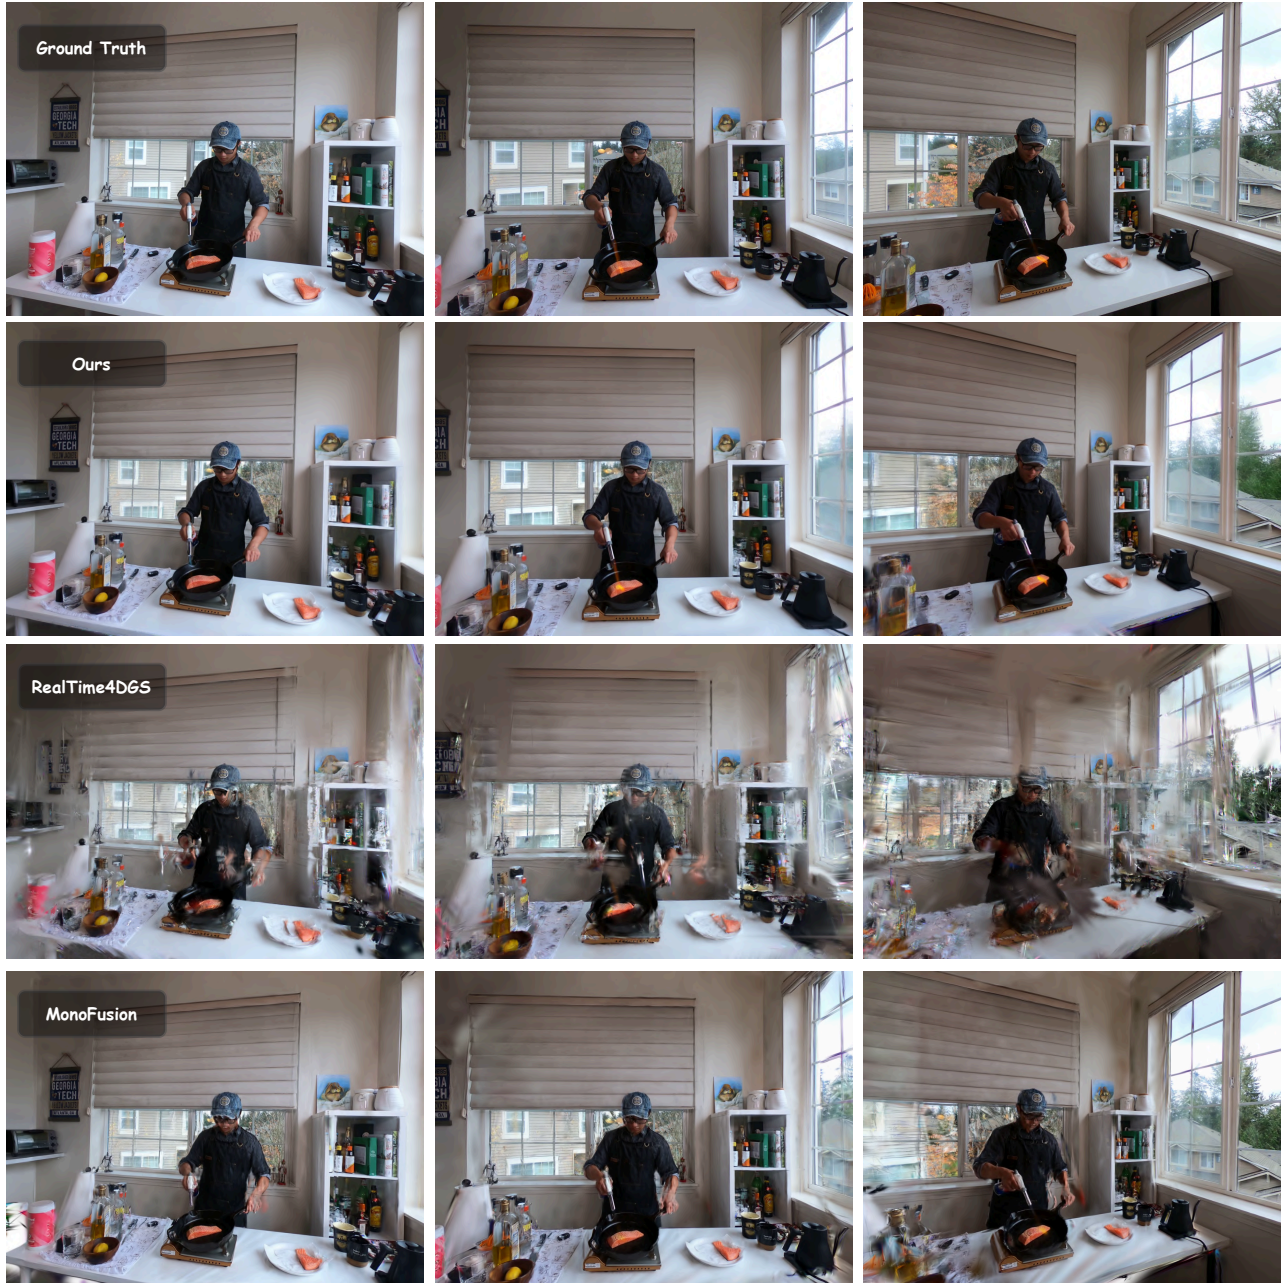

Figure 8. Additional qualitative comparison results on *Neural 3D Video Dataset* (part II).

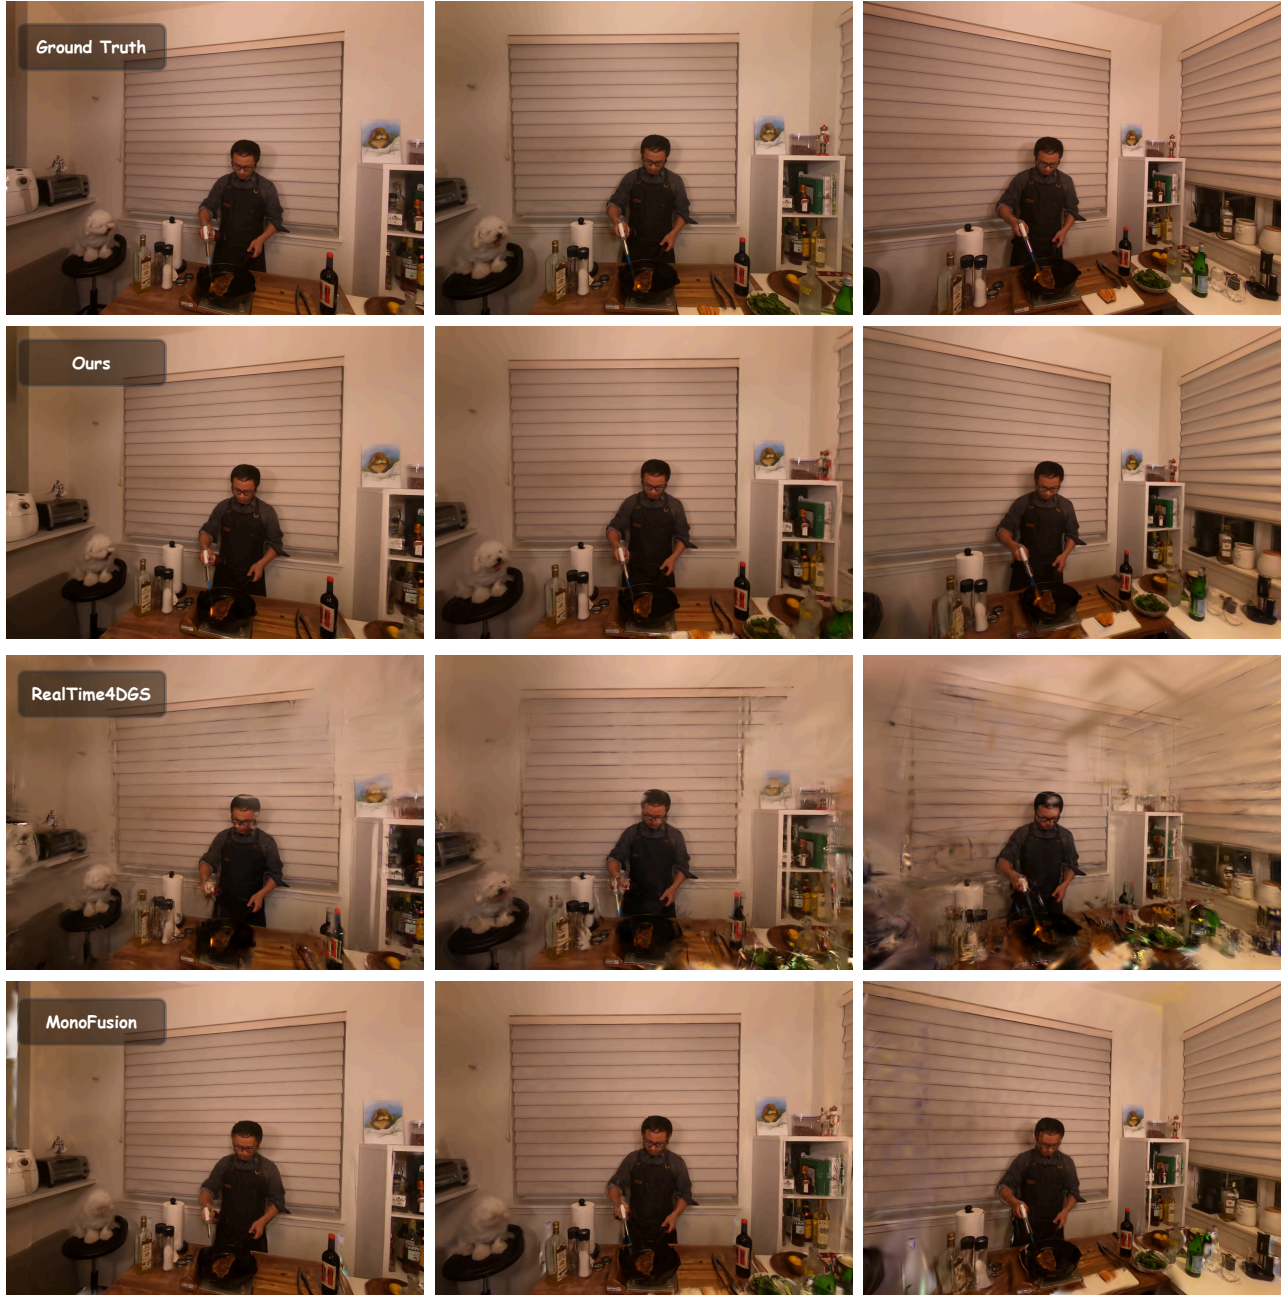

Figure 9. Additional qualitative comparison results on *Neural 3D Video Dataset* (part III).

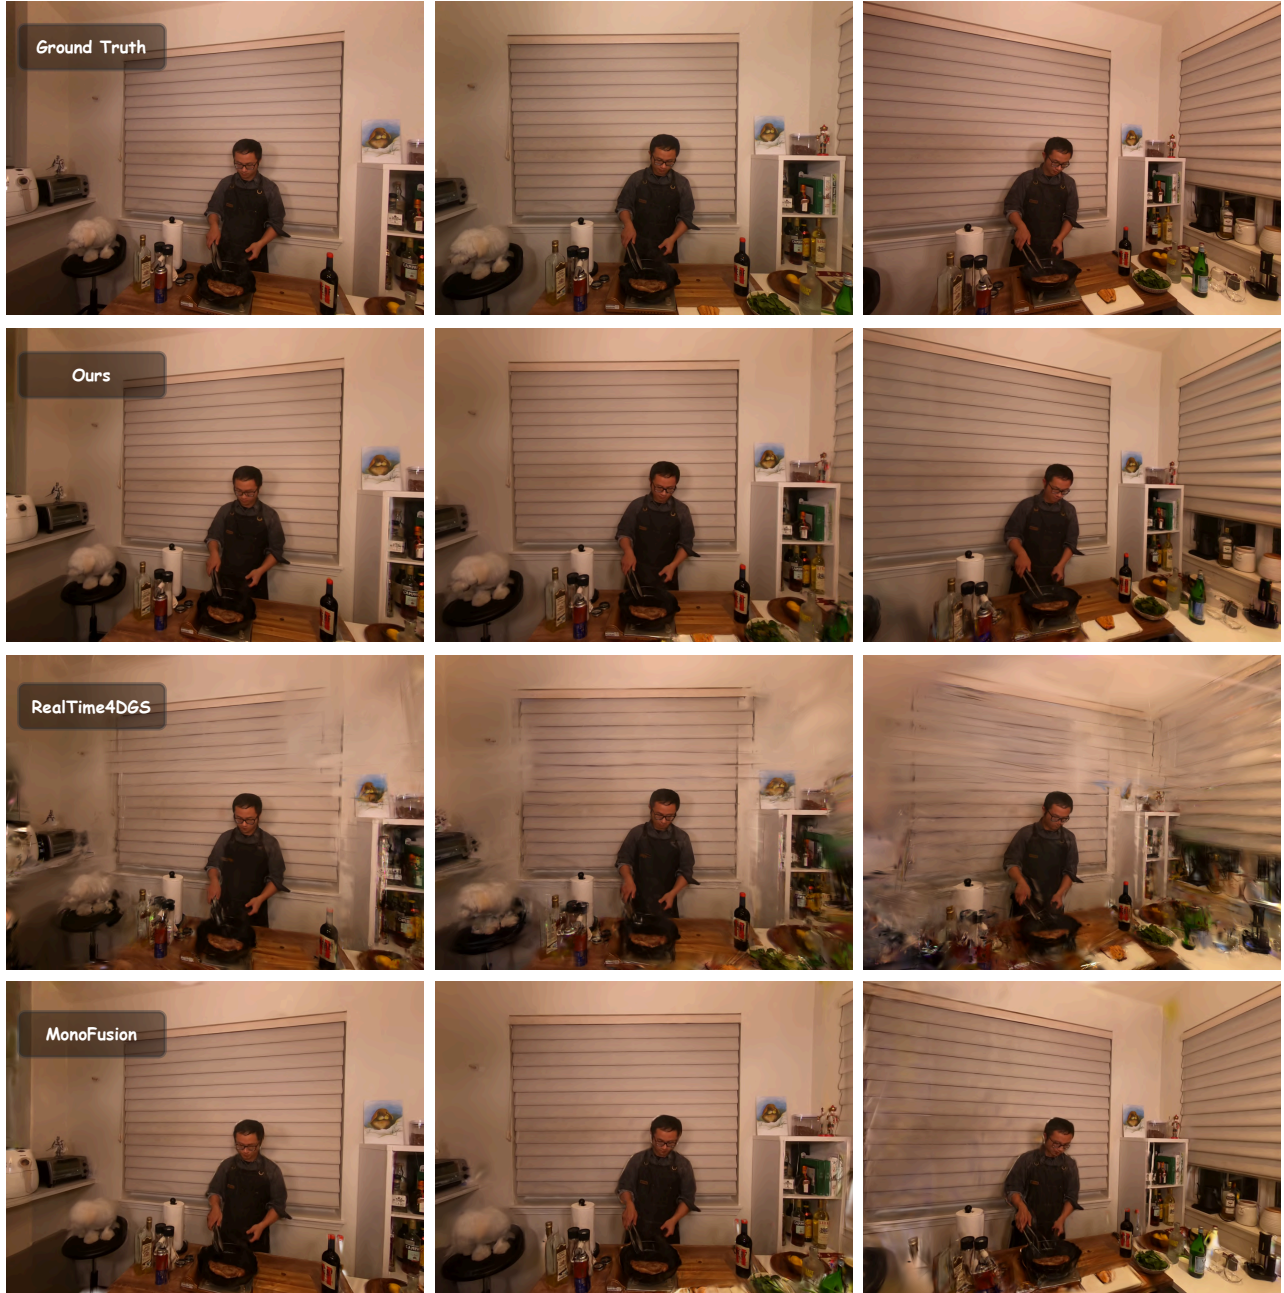

Figure 10. Additional qualitative comparison results on *Neural 3D Video Dataset* (part IV).

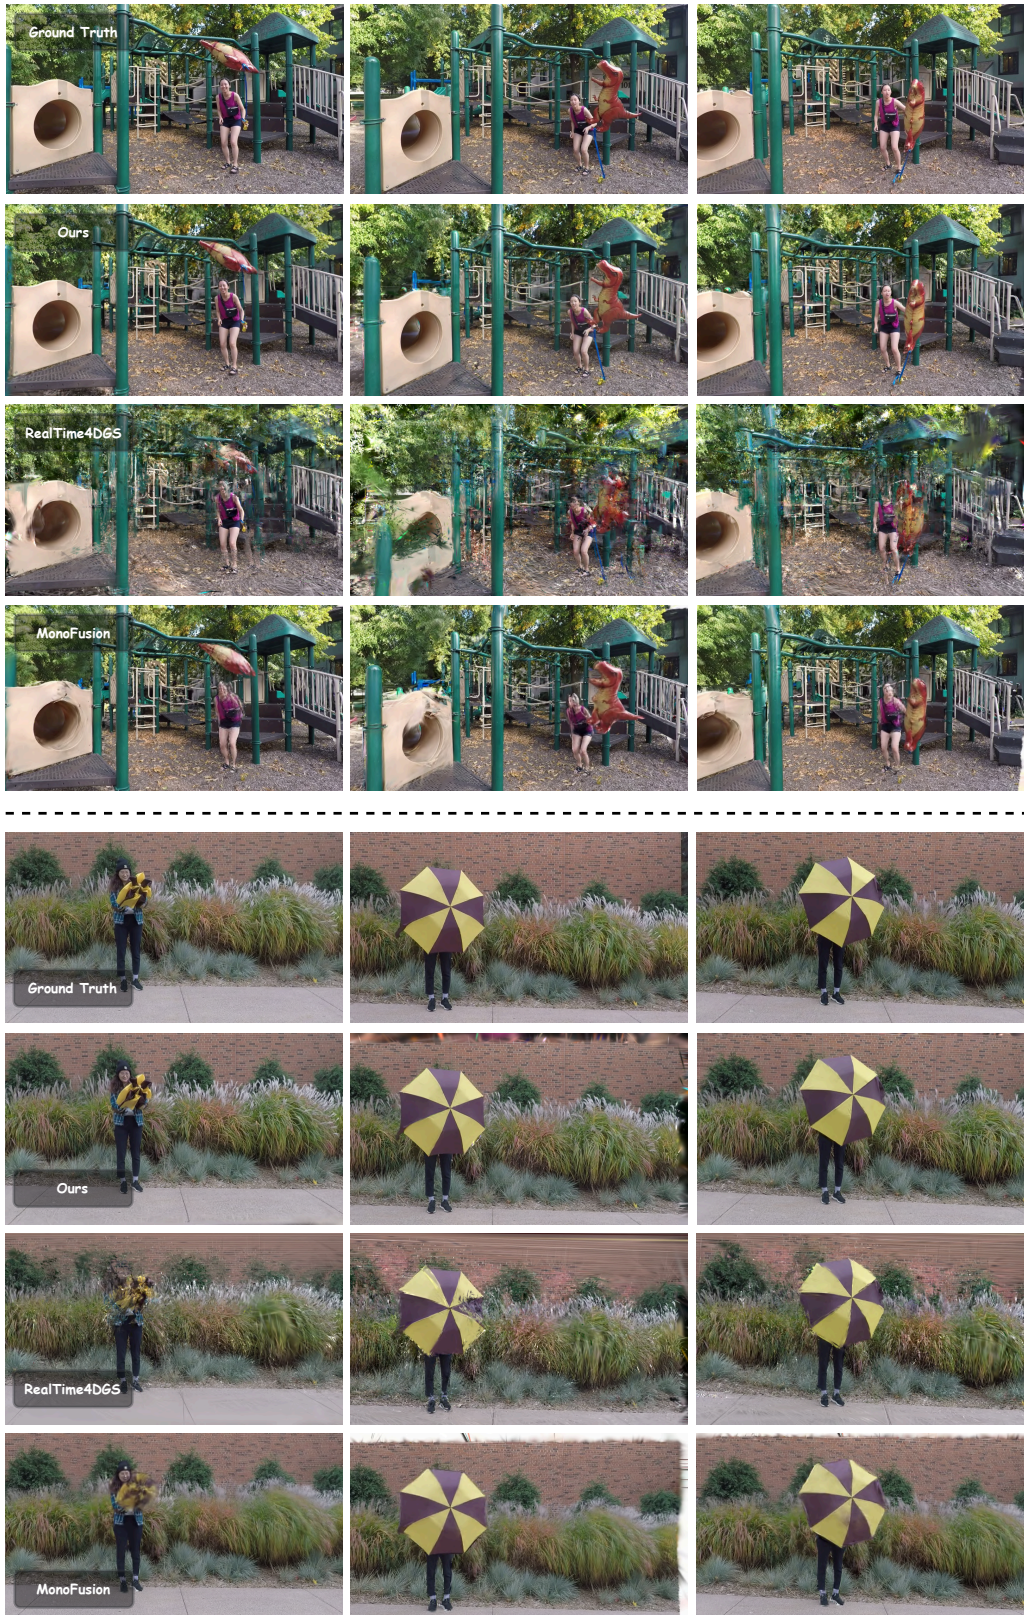

Figure 11. **Additional qualitative comparison results on *Nvidia Dynamic Scenes Dataset (part I)***. In the top panel, we emphasize the geometric completeness of the left archway and the right escalator across different viewpoints, as well as the temporal consistency of dynamic regions such as the human body, balloon, and the blue tether. In the bottom panel, we highlight the fine details of background grass, shoes, and umbrella textures, together with accurate motion fitting under fast movement in the leftmost column.

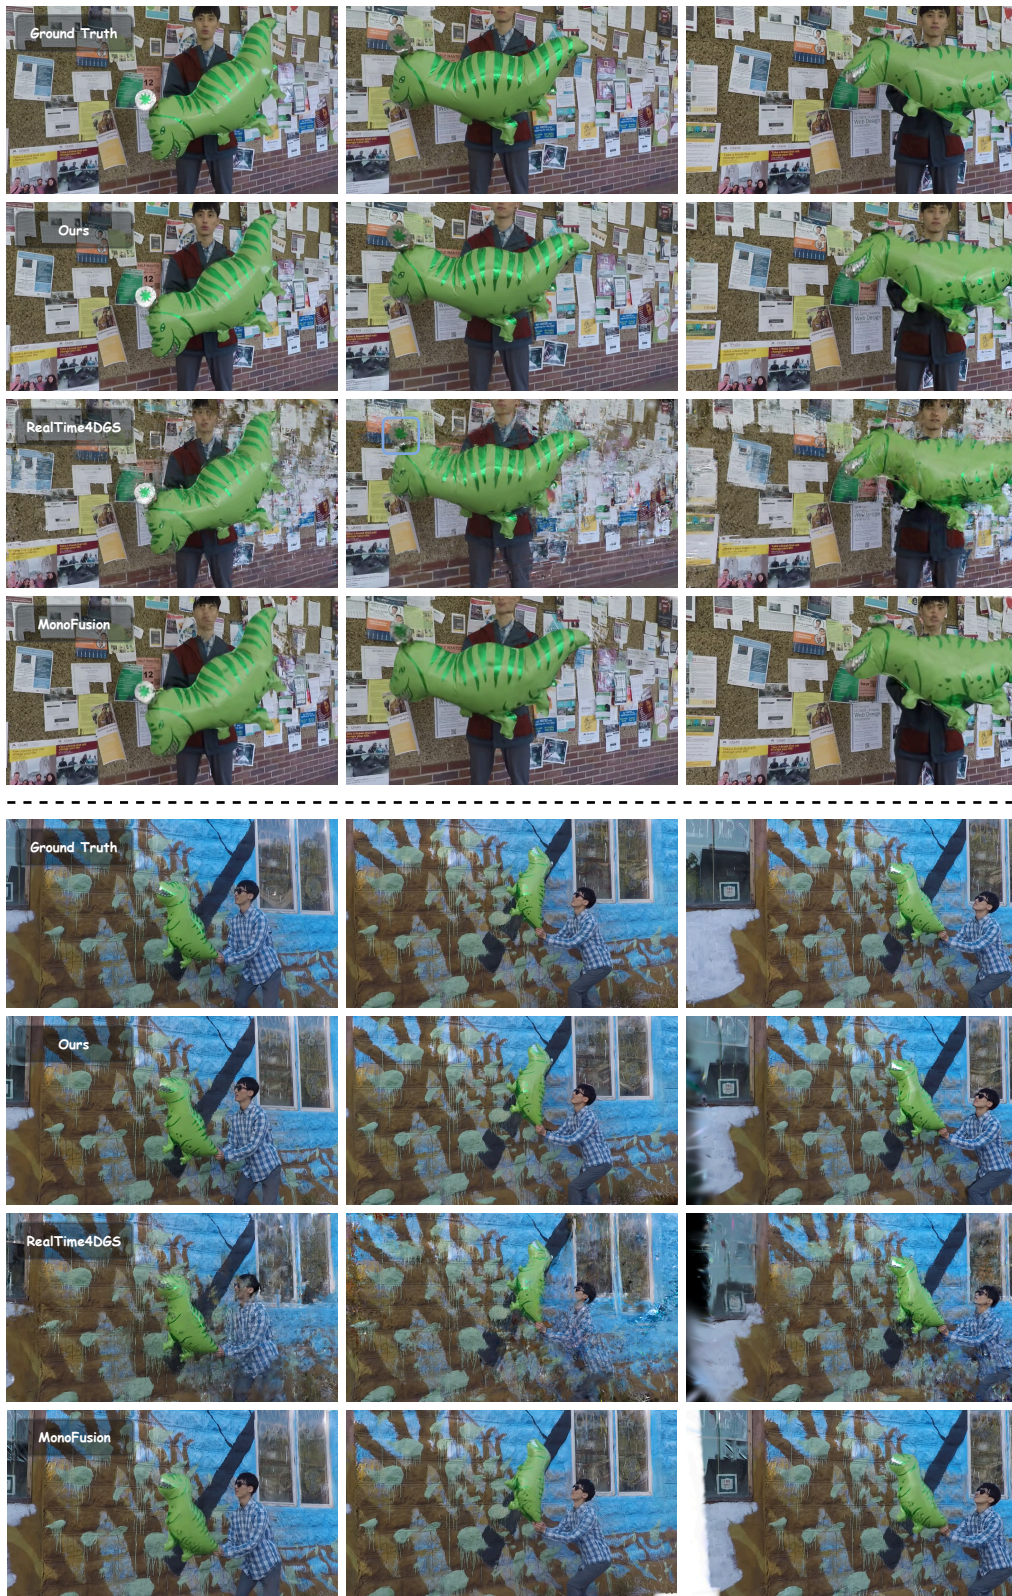

Figure 12. Additional qualitative comparison results on *Nvidia Dynamic Scenes Dataset* (part II).

Table 3. PSNR, SSIM, and LPIPS of our framework on Technicolor, with cam00, cam09 and cam15 served as training views.

| Technicolor - PSNR |        |         |       |          |         |         |
|--------------------|--------|---------|-------|----------|---------|---------|
|                    | Fabien | Theater | Train | Birthday | Painter | Average |
| HyperReel          | 13.62  | 14.24   | 15.44 | 12.28    | 15.13   | 14.14   |
| 4DGaussians        | 18.31  | 17.53   | 16.72 | 11.97    | 16.48   | 16.20   |
| 4DRotor            | 15.21  | 16.00   | 14.01 | 12.42    | 16.62   | 14.85   |
| RealTime4DGS       | 13.00  | 16.27   | 16.59 | 18.45    | 18.76   | 16.53   |
| MonoFusion         | 17.86  | 19.48   | 15.12 | 16.47    | 20.92   | 17.97   |
| Ours               | 25.23  | 22.44   | 21.56 | 20.11    | 26.39   | 23.15   |

  

| Technicolor - SSIM |        |         |       |          |         |         |
|--------------------|--------|---------|-------|----------|---------|---------|
|                    | Fabien | Theater | Train | Birthday | Painter | Average |
| HyperReel          | 0.653  | 0.434   | 0.351 | 0.341    | 0.484   | 0.453   |
| 4DGaussians        | 0.704  | 0.552   | 0.435 | 0.335    | 0.499   | 0.505   |
| 4DRotor            | 0.625  | 0.479   | 0.270 | 0.307    | 0.450   | 0.426   |
| RealTime4DGS       | 0.520  | 0.451   | 0.438 | 0.586    | 0.556   | 0.510   |
| MonoFusion         | 0.737  | 0.590   | 0.392 | 0.524    | 0.648   | 0.578   |
| Ours               | 0.814  | 0.686   | 0.656 | 0.683    | 0.802   | 0.728   |

  

| Technicolor - LPIPS |        |         |       |          |         |         |
|---------------------|--------|---------|-------|----------|---------|---------|
|                     | Fabien | Theater | Train | Birthday | Painter | Average |
| HyperReel           | 0.514  | 0.666   | 0.595 | 0.664    | 0.642   | 0.616   |
| 4DGaussians         | 0.492  | 0.539   | 0.546 | 0.620    | 0.564   | 0.552   |
| 4DRotor             | 0.574  | 0.571   | 0.589 | 0.612    | 0.560   | 0.581   |
| RealTime4DGS        | 0.614  | 0.623   | 0.505 | 0.437    | 0.529   | 0.542   |
| MonoFusion          | 0.415  | 0.380   | 0.356 | 0.339    | 0.271   | 0.352   |
| Ours                | 0.340  | 0.379   | 0.264 | 0.274    | 0.236   | 0.299   |

Table 4. PSNR, SSIM, and LPIPS of our framework on Neural 3D Video, with cam01, cam05 and cam10 served as training views.

| Neural 3D Video - PSNR |                |              |                  |              |             |            |         |
|------------------------|----------------|--------------|------------------|--------------|-------------|------------|---------|
|                        | coffee martini | cook spinach | cut roasted beef | flame salmon | flame steak | sear steak | Average |
| HyperReel              | 14.07          | 16.44        | 17.04            | 10.64        | 17.57       | 17.28      | 15.63   |
| 4DGaussians            | 14.49          | 17.94        | 18.34            | 14.83        | 19.53       | 18.57      | 17.40   |
| 4DRotor                | 15.86          | 19.65        | 18.51            | 16.10        | 19.69       | 19.05      | 18.20   |
| RealTime4DGS           | 15.07          | 17.95        | 17.04            | 14.65        | 19.57       | 18.86      | 17.31   |
| MonoFusion             | 15.59          | 19.71        | 19.15            | 15.42        | 20.02       | 19.91      | 18.43   |
| Ours                   | 18.40          | 23.93        | 22.43            | 18.92        | 23.30       | 23.56      | 21.91   |

  

| Neural 3D Video - SSIM |                |              |                  |              |             |            |         |
|------------------------|----------------|--------------|------------------|--------------|-------------|------------|---------|
|                        | coffee martini | cook spinach | cut roasted beef | flame salmon | flame steak | sear steak | Average |
| HyperReel              | 0.520          | 0.586        | 0.635            | 0.452        | 0.644       | 0.633      | 0.582   |
| 4DGaussian             | 0.593          | 0.664        | 0.696            | 0.611        | 0.736       | 0.716      | 0.673   |
| 4DRotor                | 0.649          | 0.741        | 0.715            | 0.651        | 0.753       | 0.744      | 0.708   |
| RealTime4DGS           | 0.590          | 0.670        | 0.640            | 0.569        | 0.708       | 0.700      | 0.649   |
| MonoFusion             | 0.643          | 0.780        | 0.777            | 0.630        | 0.788       | 0.784      | 0.738   |
| Ours                   | 0.729          | 0.832        | 0.792            | 0.726        | 0.820       | 0.818      | 0.789   |

  

| Neural 3D Video - LPIPS |                |              |                  |              |             |            |         |
|-------------------------|----------------|--------------|------------------|--------------|-------------|------------|---------|
|                         | coffee martini | cook spinach | cut roasted beef | flame salmon | flame steak | sear steak | Average |
| HyperReel               | 0.540          | 0.499        | 0.447            | 0.604        | 0.466       | 0.459      | 0.500   |
| 4DGaussians             | 0.401          | 0.320        | 0.325            | 0.362        | 0.258       | 0.270      | 0.320   |
| 4DRotor                 | 0.406          | 0.334        | 0.359            | 0.371        | 0.334       | 0.336      | 0.357   |
| RealTime4DGS            | 0.471          | 0.428        | 0.459            | 0.485        | 0.405       | 0.412      | 0.442   |
| MonoFusion              | 0.367          | 0.228        | 0.236            | 0.354        | 0.229       | 0.231      | 0.270   |
| Ours                    | 0.298          | 0.232        | 0.259            | 0.291        | 0.237       | 0.238      | 0.258   |

Table 5. PSNR, SSIM, and LPIPS of our framework on Nvidia Dynamic Scenes, with cam01, cam06 and cam10 as training views.

| Nvidia Dynamic Scenes - PSNR |         |          |          |            |         |          |         |
|------------------------------|---------|----------|----------|------------|---------|----------|---------|
|                              | jumping | balloon1 | balloon3 | playground | skating | umbrella | Average |
| HyperReel                    | 24.45   | 15.46    | 22.58    | 15.41      | 21.05   | 24.74    | 19.88   |
| 4DGaussians                  | 17.38   | 16.96    | 14.56    | 12.75      | 19.70   | 19.52    | 16.81   |
| 4DRotor                      | 21.90   | 14.55    | 20.33    | 10.95      | 26.28   | 22.29    | 19.38   |
| RealTime4DGS                 | 17.85   | 18.36    | 19.07    | 13.96      | 18.52   | 19.71    | 17.91   |
| MonoFusion                   | 20.72   | 20.31    | 19.81    | 16.86      | 23.55   | 20.07    | 20.22   |
| Ours                         | 24.36   | 25.31    | 25.33    | 19.64      | 28.73   | 25.42    | 24.81   |

  

| Nvidia Dynamic Scenes - SSIM |         |          |          |            |         |          |         |
|------------------------------|---------|----------|----------|------------|---------|----------|---------|
|                              | jumping | balloon1 | balloon3 | playground | skating | umbrella | Average |
| HyperReel                    | 0.782   | 0.350    | 0.632    | 0.281      | 0.669   | 0.629    | 0.528   |
| 4DGaussians                  | 0.525   | 0.372    | 0.264    | 0.166      | 0.607   | 0.299    | 0.372   |
| 4DRotor                      | 0.731   | 0.311    | 0.497    | 0.137      | 0.814   | 0.556    | 0.508   |
| RealTime4DGS                 | 0.585   | 0.533    | 0.509    | 0.267      | 0.649   | 0.333    | 0.479   |
| MonoFusion                   | 0.687   | 0.563    | 0.542    | 0.499      | 0.819   | 0.428    | 0.590   |
| Ours                         | 0.793   | 0.810    | 0.791    | 0.672      | 0.906   | 0.794    | 0.794   |

  

| Nvidia Dynamic Scenes - LPIPS |         |          |          |            |         |          |         |
|-------------------------------|---------|----------|----------|------------|---------|----------|---------|
|                               | jumping | balloon1 | balloon3 | playground | skating | umbrella | Average |
| HyperReel                     | 0.256   | 0.537    | 0.266    | 0.491      | 0.450   | 0.238    | 0.396   |
| 4DGaussians                   | 0.454   | 0.473    | 0.609    | 0.608      | 0.449   | 0.498    | 0.516   |
| 4DRotor                       | 0.245   | 0.601    | 0.392    | 0.670      | 0.166   | 0.260    | 0.389   |
| RealTime4DGS                  | 0.450   | 0.371    | 0.380    | 0.499      | 0.422   | 0.432    | 0.426   |
| MonoFusion                    | 0.241   | 0.151    | 0.174    | 0.206      | 0.134   | 0.248    | 0.192   |
| Ours                          | 0.170   | 0.127    | 0.142    | 0.190      | 0.121   | 0.148    | 0.150   |

Table 6. PSNR, SSIM, and LPIPS of our framework on **Technicolor**. Three cameras (cam00, cam09 and cam15) are served as training views for scene *Fabien*, *Theater* and *Train*, while only two cameras (cam00 and cam15) are training views for scene *Birthday* and *Painter*.

| Technicolor - PSNR |        |         |        |          |         |         |
|--------------------|--------|---------|--------|----------|---------|---------|
|                    | Fabien | Theater | Train  | Birthday | Painter | Average |
| cam01              | 25.581 | 21.231  | 23.456 | 19.562   | 26.322  | 23.23   |
| cam02              | 21.886 | 19.203  | 21.202 | 18.227   | 25.736  | 21.251  |
| cam03              | 18.844 | 18.5    | 19.468 | 17.692   | 27.939  | 20.488  |
| cam04              | 28.676 | 23.089  | 23.59  | 20.991   | 27.423  | 24.754  |
| cam05              | 28.162 | 23.422  | 23.833 | 20.837   | 27.249  | 24.701  |
| cam06              | 23.838 | 20.949  | 21.0   | 19.824   | 25.58   | 22.238  |
| cam07              | 20.735 | 19.916  | 19.228 | 19.306   | 25.717  | 20.98   |
| cam08              | 28.175 | 23.997  | 23.649 | 20.245   | 25.817  | 24.377  |
| cam10              | 25.706 | 23.722  | 20.932 | 20.962   | 26.613  | 23.587  |
| cam11              | 24.939 | 23.549  | 21.013 | 21.682   | 27.519  | 23.741  |
| cam12              | 25.122 | 23.568  | 20.321 | 19.482   | 23.795  | 22.457  |
| cam13              | 27.505 | 25.954  | 21.626 | 20.643   | 26.436  | 24.433  |
| cam14              | 28.818 | 24.666  | 20.962 | 21.986   | 26.913  | 24.669  |
| Average            | 25.23  | 22.444  | 21.56  | 20.111   | 26.389  | 23.147  |

  

| Technicolor - SSIM |        |         |       |          |         |         |
|--------------------|--------|---------|-------|----------|---------|---------|
|                    | Fabien | Theater | Train | Birthday | Painter | Average |
| cam01              | 0.846  | 0.665   | 0.71  | 0.69     | 0.789   | 0.74    |
| cam02              | 0.801  | 0.609   | 0.638 | 0.634    | 0.803   | 0.697   |
| cam03              | 0.75   | 0.556   | 0.644 | 0.651    | 0.86    | 0.692   |
| cam04              | 0.835  | 0.697   | 0.726 | 0.715    | 0.823   | 0.759   |
| cam05              | 0.842  | 0.755   | 0.762 | 0.709    | 0.824   | 0.779   |
| cam06              | 0.821  | 0.675   | 0.658 | 0.682    | 0.784   | 0.724   |
| cam07              | 0.776  | 0.62    | 0.619 | 0.675    | 0.761   | 0.69    |
| cam08              | 0.81   | 0.725   | 0.741 | 0.683    | 0.787   | 0.749   |
| cam10              | 0.825  | 0.701   | 0.539 | 0.687    | 0.797   | 0.71    |
| cam11              | 0.82   | 0.687   | 0.665 | 0.726    | 0.826   | 0.745   |
| cam12              | 0.778  | 0.689   | 0.562 | 0.64     | 0.761   | 0.686   |
| cam13              | 0.83   | 0.781   | 0.657 | 0.669    | 0.819   | 0.751   |
| cam14              | 0.85   | 0.753   | 0.612 | 0.713    | 0.79    | 0.744   |
| Average            | 0.814  | 0.686   | 0.656 | 0.683    | 0.802   | 0.728   |

  

| Technicolor - LPIPS |        |         |       |          |         |         |
|---------------------|--------|---------|-------|----------|---------|---------|
|                     | Fabien | Theater | Train | Birthday | Painter | Average |
| cam01               | 0.305  | 0.355   | 0.24  | 0.245    | 0.218   | 0.273   |
| cam02               | 0.355  | 0.431   | 0.301 | 0.303    | 0.231   | 0.324   |
| cam03               | 0.394  | 0.484   | 0.328 | 0.319    | 0.218   | 0.349   |
| cam04               | 0.34   | 0.342   | 0.225 | 0.24     | 0.218   | 0.273   |
| cam05               | 0.323  | 0.329   | 0.214 | 0.253    | 0.221   | 0.268   |
| cam06               | 0.333  | 0.399   | 0.27  | 0.275    | 0.235   | 0.302   |
| cam07               | 0.367  | 0.447   | 0.307 | 0.291    | 0.266   | 0.336   |
| cam08               | 0.357  | 0.343   | 0.211 | 0.281    | 0.249   | 0.288   |
| cam10               | 0.307  | 0.36    | 0.266 | 0.259    | 0.24    | 0.287   |
| cam11               | 0.304  | 0.38    | 0.249 | 0.235    | 0.225   | 0.278   |
| cam12               | 0.404  | 0.387   | 0.315 | 0.323    | 0.266   | 0.339   |
| cam13               | 0.336  | 0.316   | 0.258 | 0.295    | 0.247   | 0.29    |
| cam14               | 0.287  | 0.347   | 0.255 | 0.241    | 0.238   | 0.274   |
| Average             | 0.34   | 0.379   | 0.264 | 0.274    | 0.236   | 0.299   |

Table 7. PSNR, SSIM, and LPIPS of our framework on **Neural 3D Video**. Three cameras (cam01, cam05 and cam10) are training views.

| Neural 3D Video - PSNR |                |              |                  |              |             |            |         |
|------------------------|----------------|--------------|------------------|--------------|-------------|------------|---------|
|                        | coffee martini | cook spinach | cut roasted beef | flame salmon | flame steak | sear steak | Average |
| cam00                  | 21.654         | 28.114       | 26.901           | 22.323       | 27.558      | 27.744     | 25.715  |
| cam02                  | 25.236         | 25.926       | 25.206           | 24.866       | 25.472      | 25.365     | 25.345  |
| cam03                  | -              | 25.194       | 24.231           | -            | 25.489      | 25.891     | 25.201  |
| cam04                  | 25.477         | 31.417       | -                | 25.741       | 31.034      | 30.641     | 28.862  |
| cam06                  | 20.31          | 27.966       | 26.145           | 21.048       | 27.624      | 27.609     | 25.117  |
| cam07                  | 19.602         | 26.638       | 24.25            | 20.449       | 25.344      | 25.759     | 23.674  |
| cam08                  | 19.134         | 26.957       | 24.089           | 19.889       | 26.177      | 26.647     | 23.816  |
| cam09                  | 20.957         | 26.997       | 26.072           | 21.31        | 27.161      | 27.446     | 24.99   |
| cam11                  | 14.669         | 20.251       | 19.145           | 15.398       | 19.277      | 19.349     | 18.015  |
| cam12                  | 13.623         | 19.353       | 18.495           | 14.841       | 18.082      | 18.604     | 17.166  |
| cam13                  | 15.547         | 20.289       | 20.071           | 16.839       | 19.371      | 20.014     | 18.688  |
| cam14                  | 16.705         | 22.012       | 22.252           | 17.309       | 20.462      | 21.098     | 19.973  |
| cam15                  | -              | 22.182       | 21.68            | 16.824       | 20.618      | 21.2       | 20.501  |
| cam16                  | 15.457         | 21.483       | 20.783           | 16.689       | 20.086      | 20.699     | 19.199  |
| cam17                  | -              | 22.11        | 20.975           | -            | 20.894      | 21.646     | 21.406  |
| cam18                  | 14.762         | 21.959       | 20.944           | 15.755       | 20.997      | 21.37      | 19.298  |
| cam19                  | 17.115         | 22.534       | 21.444           | 17.245       | 22.972      | 23.031     | 20.722  |
| cam20                  | 15.736         | 19.319       | 18.569           | 16.248       | 20.715      | 20.014     | 18.434  |
| Average                | 18.399         | 23.927       | 22.426           | 18.923       | 23.296      | 23.563     | 21.905  |

  

| Neural 3D Video - SSIM |                |              |                  |              |             |            |         |
|------------------------|----------------|--------------|------------------|--------------|-------------|------------|---------|
|                        | coffee martini | cook spinach | cut roasted beef | flame salmon | flame steak | sear steak | Average |
| cam00                  | 0.832          | 0.907        | 0.897            | 0.841        | 0.918       | 0.915      | 0.885   |
| cam02                  | 0.875          | 0.917        | 0.906            | 0.87         | 0.907       | 0.905      | 0.897   |
| cam03                  | -              | 0.919        | 0.893            | -            | 0.903       | 0.911      | 0.906   |
| cam04                  | 0.889          | 0.941        | -                | 0.884        | 0.945       | 0.94       | 0.92    |
| cam06                  | 0.767          | 0.898        | 0.862            | 0.774        | 0.899       | 0.894      | 0.849   |
| cam07                  | 0.735          | 0.876        | 0.814            | 0.754        | 0.859       | 0.861      | 0.816   |
| cam08                  | 0.735          | 0.874        | 0.8              | 0.754        | 0.874       | 0.87       | 0.818   |
| cam09                  | 0.786          | 0.892        | 0.868            | 0.8          | 0.893       | 0.892      | 0.855   |
| cam11                  | 0.673          | 0.751        | 0.712            | 0.643        | 0.735       | 0.723      | 0.706   |
| cam12                  | 0.65           | 0.717        | 0.684            | 0.627        | 0.689       | 0.69       | 0.676   |
| cam13                  | 0.67           | 0.772        | 0.76             | 0.676        | 0.756       | 0.753      | 0.731   |
| cam14                  | 0.726          | 0.815        | 0.804            | 0.719        | 0.792       | 0.787      | 0.774   |
| cam15                  | -              | 0.797        | 0.772            | 0.691        | 0.779       | 0.774      | 0.762   |
| cam16                  | 0.669          | 0.772        | 0.74             | 0.676        | 0.744       | 0.746      | 0.724   |
| cam17                  | -              | 0.772        | 0.728            | -            | 0.741       | 0.752      | 0.748   |
| cam18                  | 0.613          | 0.767        | 0.716            | 0.629        | 0.739       | 0.732      | 0.699   |
| cam19                  | 0.667          | 0.785        | 0.758            | 0.656        | 0.79        | 0.792      | 0.741   |
| cam20                  | 0.646          | 0.795        | 0.757            | 0.62         | 0.799       | 0.787      | 0.734   |
| Average                | 0.729          | 0.832        | 0.792            | 0.726        | 0.82        | 0.818      | 0.789   |

  

| Neural 3D Video - LPIPS |                |              |                  |              |             |            |         |
|-------------------------|----------------|--------------|------------------|--------------|-------------|------------|---------|
|                         | coffee martini | cook spinach | cut roasted beef | flame salmon | flame steak | sear steak | Average |
| cam00                   | 0.21           | 0.173        | 0.185            | 0.195        | 0.167       | 0.17       | 0.183   |
| cam02                   | 0.184          | 0.16         | 0.173            | 0.179        | 0.169       | 0.17       | 0.172   |
| cam03                   | -              | 0.169        | 0.186            | -            | 0.179       | 0.177      | 0.178   |
| cam04                   | 0.181          | 0.155        | -                | 0.17         | 0.151       | 0.151      | 0.161   |
| cam06                   | 0.25           | 0.183        | 0.207            | 0.235        | 0.179       | 0.182      | 0.206   |
| cam07                   | 0.273          | 0.183        | 0.223            | 0.252        | 0.191       | 0.192      | 0.219   |
| cam08                   | 0.266          | 0.182        | 0.222            | 0.249        | 0.178       | 0.18       | 0.213   |
| cam09                   | 0.219          | 0.15         | 0.168            | 0.204        | 0.146       | 0.147      | 0.172   |
| cam11                   | 0.37           | 0.317        | 0.339            | 0.372        | 0.326       | 0.329      | 0.342   |
| cam12                   | 0.388          | 0.324        | 0.346            | 0.387        | 0.344       | 0.343      | 0.355   |
| cam13                   | 0.358          | 0.281        | 0.291            | 0.347        | 0.286       | 0.292      | 0.309   |
| cam14                   | 0.313          | 0.252        | 0.261            | 0.312        | 0.259       | 0.264      | 0.277   |
| cam15                   | -              | 0.265        | 0.285            | 0.327        | 0.271       | 0.276      | 0.284   |
| cam16                   | 0.357          | 0.278        | 0.304            | 0.345        | 0.294       | 0.293      | 0.312   |
| cam17                   | -              | 0.274        | 0.308            | -            | 0.291       | 0.288      | 0.29    |
| cam18                   | 0.384          | 0.278        | 0.311            | 0.372        | 0.291       | 0.296      | 0.322   |
| cam19                   | 0.352          | 0.277        | 0.294            | 0.348        | 0.268       | 0.27       | 0.301   |
| cam20                   | 0.373          | 0.279        | 0.307            | 0.367        | 0.27        | 0.272      | 0.311   |
| Average                 | 0.298          | 0.232        | 0.259            | 0.291        | 0.237       | 0.238      | 0.258   |

Table 8. **PSNR, SSIM, and LPIPS of our framework on Nvidia Dynamic Scenes.** Three cameras (cam01, cam06 and cam10) are training views.

| Nvidia Dynamic Scenes - PSNR |         |          |          |            |         |          |         |
|------------------------------|---------|----------|----------|------------|---------|----------|---------|
|                              | jumping | balloon1 | balloon3 | playground | skating | umbrella | Average |
| cam02                        | 25.867  | 26.076   | 28.318   | 19.736     | 32.098  | 26.946   | 26.507  |
| cam03                        | 23.858  | 25.564   | 27.681   | 19.201     | 26.698  | 27.409   | 25.069  |
| cam04                        | 25.41   | 25.337   | 26.352   | 18.441     | 30.907  | 27.033   | 25.58   |
| cam05                        | 26.698  | 26.248   | 27.455   | 20.261     | 32.017  | 28.36    | 26.84   |
| cam07                        | 24.477  | 25.839   | 27.519   | 19.161     | 29.468  | 22.384   | 24.808  |
| cam08                        | 25.006  | 24.963   | 21.572   | 19.643     | 30.531  | 22.493   | 24.035  |
| cam09                        | 27.679  | 27.486   | 23.516   | 19.941     | 33.348  | 23.373   | 25.89   |
| cam11                        | 20.699  | 25.297   | 24.761   | 20.925     | 21.651  | 25.361   | 23.116  |
| cam12                        | 19.521  | 20.987   | 20.808   | 19.436     | 21.827  | 25.385   | 21.328  |
| Average                      | 24.357  | 25.311   | 25.331   | 19.638     | 28.727  | 25.416   | 24.807  |

  

| Nvidia Dynamic Scenes - SSIM |         |          |          |            |         |          |         |
|------------------------------|---------|----------|----------|------------|---------|----------|---------|
|                              | jumping | balloon1 | balloon3 | playground | skating | umbrella | Average |
| cam02                        | 0.818   | 0.848    | 0.878    | 0.695      | 0.93    | 0.822    | 0.832   |
| cam03                        | 0.756   | 0.82     | 0.88     | 0.626      | 0.826   | 0.818    | 0.788   |
| cam04                        | 0.802   | 0.814    | 0.845    | 0.617      | 0.908   | 0.807    | 0.799   |
| cam05                        | 0.858   | 0.845    | 0.832    | 0.699      | 0.934   | 0.84     | 0.835   |
| cam07                        | 0.78    | 0.83     | 0.848    | 0.625      | 0.919   | 0.758    | 0.793   |
| cam08                        | 0.814   | 0.795    | 0.519    | 0.67       | 0.931   | 0.686    | 0.736   |
| cam09                        | 0.875   | 0.87     | 0.81     | 0.69       | 0.949   | 0.8      | 0.832   |
| cam11                        | 0.784   | 0.836    | 0.805    | 0.74       | 0.894   | 0.813    | 0.812   |
| cam12                        | 0.65    | 0.635    | 0.699    | 0.684      | 0.865   | 0.799    | 0.722   |
| Average                      | 0.793   | 0.81     | 0.791    | 0.672      | 0.906   | 0.794    | 0.794   |

  

| Nvidia Dynamic Scenes - LPIPS |         |          |          |            |         |          |         |
|-------------------------------|---------|----------|----------|------------|---------|----------|---------|
|                               | jumping | balloon1 | balloon3 | playground | skating | umbrella | Average |
| cam02                         | 0.144   | 0.108    | 0.106    | 0.182      | 0.096   | 0.122    | 0.126   |
| cam03                         | 0.197   | 0.12     | 0.108    | 0.187      | 0.156   | 0.147    | 0.152   |
| cam04                         | 0.165   | 0.128    | 0.119    | 0.23       | 0.113   | 0.139    | 0.149   |
| cam05                         | 0.127   | 0.115    | 0.115    | 0.177      | 0.094   | 0.129    | 0.126   |
| cam07                         | 0.176   | 0.126    | 0.12     | 0.219      | 0.13    | 0.178    | 0.158   |
| cam08                         | 0.159   | 0.134    | 0.216    | 0.197      | 0.113   | 0.175    | 0.166   |
| cam09                         | 0.128   | 0.106    | 0.153    | 0.176      | 0.097   | 0.161    | 0.137   |
| cam11                         | 0.185   | 0.126    | 0.143    | 0.151      | 0.138   | 0.137    | 0.147   |
| cam12                         | 0.248   | 0.182    | 0.195    | 0.192      | 0.152   | 0.148    | 0.186   |
| Average                       | 0.17    | 0.127    | 0.142    | 0.19       | 0.121   | 0.148    | 0.15    |
